# Supplementary material for: Drug resistance of bladder cancer cells through activation of ABCG2 by FOXM1
Source: PubMed Central journal article supplement — BMB Rep. 2018 Feb 28;51(2):98–103. doi: 10.5483/BMBRep.2018.51.2.222 (PMC5836564; doi:10.5483/bmbrep.2018.51.2.222), 2018-02-28

# **Resistance of bladder cancer to doxorubicin through upregulation of ABCG2 transcription by FOXM1**

Yun-Gil Roh<sup>1</sup>, Mi-Hye Mun<sup>1</sup>, Mi-So Jeong<sup>1</sup>, Won-Tae Kim<sup>1</sup>, Se-Ra Lee<sup>2</sup>, Jin-Woong Chung<sup>1</sup>,  
Seung Il Kim<sup>3,4</sup>, Tae Nam Kim<sup>5</sup>, Jong Kil Nam<sup>6</sup> and Sun-Hee Leem<sup>1\*</sup>

Supplementary Table S1 Primers for plasmid construction.

Supplementary Table S2 qPCR primer set.

Fig. S1. FOXM1 regulates the transcription level of the ABC transporter gene family.

(a) scRNA or siRNA-transfected KU7 cell ABC transporter gene mRNA was measured using qRT-PCR. (b) mRNA expression of FOXM1 and ABCG2 was checked using qRT-PCR in bladder cancer cells. (c) Protein expression was examined by Western blotting in bladder cancer cells. (d) Cell viability was measured by MTT assay.

**Supplemental Table S1****Table S1. Primers for plasmid construction**

| Primer name      | Primer sequence                                             | Primer length | Product size |
|------------------|-------------------------------------------------------------|---------------|--------------|
| pFOXM1-V5 tag F  | 5' ATGC GGATCC (BamHI)<br>GCC ATG AAA ACT AGC CCC CGT CG 3' | 33 mer        | 2249 bp      |
| pFOXM1-V5 tag R  | 5' ATGC CTCGAG (XhoI)<br>CGC TGT AGC TCA GGA ATA AAC TG 3'  | 33 mer        |              |
| ABCG2 promoter F | 5' AGTC GGTACC (KpnI)<br>TCT TAT CCC ATA TGT TTG TTA TG 3'  | 33 mer        | 2202 bp      |
| ABCG2 promoter R | 5' AGTC AAGCTT (HindIII)<br>CTT CGA CAT TAC TGG AAG AC 3'   | 30 mer        |              |

Supplemental Table S2

**Table S2. qPCR primer set**

| Primer name       | Primer sequence                         | Primer length | Product size |
|-------------------|-----------------------------------------|---------------|--------------|
| qPCR ACTIN F      | 5' CCC TGG AGA AGA GCT ACG AG 3'        | 20 mer        | 132 bp       |
| qPCR ACTIN R      | 5' AGG TAG TTT CGT GGA TGC CA 3'        | 20 mer        |              |
| qPCR L19 F        | 5' GCG GAA GGG TAC AGC CAA T 3'         | 19 mer        | 76 bp        |
| qPCR L19 R        | 5' GCA GCC GGC GCA AA 3'                | 14 mer        |              |
| qPCR FOXM1 F      | 5' TGC AGC TAG GGA TGT GAA TCT TC 3'    | 23 mer        | 157 bp       |
| qPCR FOXM1 R      | 5' GGA GCC CAG TCC ATC AGA ACT 3'       | 21 mer        |              |
| qPCR ABCG2 F      | 5' GCG ACC TGC CAA TTT CAA ATG 3'       | 21 mer        | 157 bp       |
| qPCR ABCG2 R      | 5' GAC CCT GTT AAT CCG TTC GTT T 3'     | 22 mer        |              |
| qChIP ABCG2 I F   | 5' TTT TCC CCC TTT CAT GGT AA 3'        | 20 mer        | 195 bp       |
| qChIP ABCG2 I R   | 5' CAG ACT CTC ACC AAG GAA CAA A 3'     | 22 mer        |              |
| qChIP ABCG2 II F  | 5' CAA CTC AAT CAT AGG CAG AGA GAA 3'   | 24 mer        | 117 bp       |
| qChIP ABCG2 II R  | 5' GAT GAG CTT AAC AAC TTG TGA AAC A 3' | 25 mer        |              |
| qChIP ABCG2 III F | 5' ATC CAT CCT TTT CCT GCT TTA TCA G 3' | 25 mer        | 128 bp       |
| qChIP ABCG2 III R | 5' GCA CAA CTT GGA ATG CAT AAA C 3'     | 22 mer        |              |
| qChIP ABCG2 NTS F | 5' AAA ATT TTG TCT CCC TAG TGC TGA C 3' | 25 mer        | 101 bp       |
| qChIP ABCG2 NTS R | 5' CAG GAA GAA GCT GCT AGA AGA AAT G 3' | 25 mer        |              |

Fig. S1

A

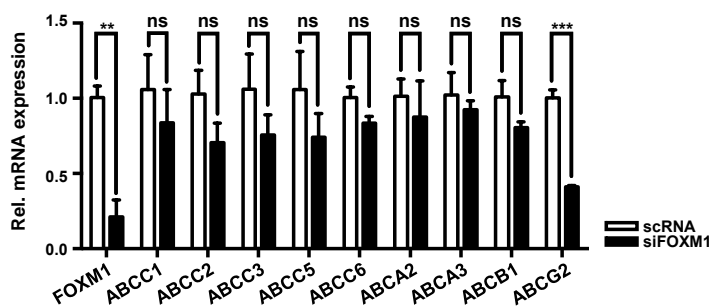

B

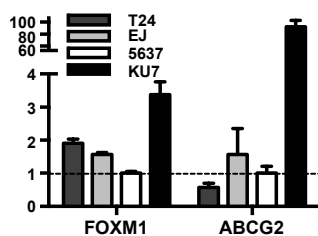

C

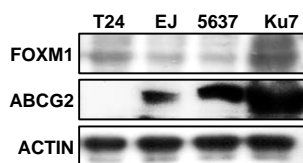

D

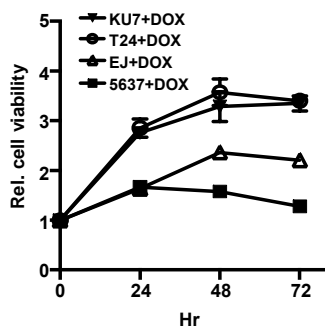

Supplement: bmb-51-098_suppl.pdf [file bmb-51-098_suppl.pdf]
